# Supplementary material for: Insights into the evolutionary conserved regulation of Rio ATPase activity
Source: PubMed Central journal article supplement — Nucleic Acids Res. 2017 Dec 9;46(3):1441–56. doi: 10.1093/nar/gkx1236 (PMC5815136; doi:10.1093/nar/gkx1236), 2017-12-09
Supplement: gkx1236_supp.pdf [file gkx1236_supp.pdf]

## **SUPPLEMENTARY DATA**

### **Insights into the evolutionary conserved regulation of the Rio ATPase activity**

Robert Knüppel, Regitse H. Christensen, Fiona C. Gray, Dominik Esser, Daniela Strauß, Jan Medenbach, Bettina Siebers, Stuart A. MacNeill, Nicole LaRonde, and Sébastien Ferreira-Cerca

### **Supplementary Figures and Tables**

Supplementary Figures 1-3

Supplementary Tables 1-3

## Supplementary Figures

**A**

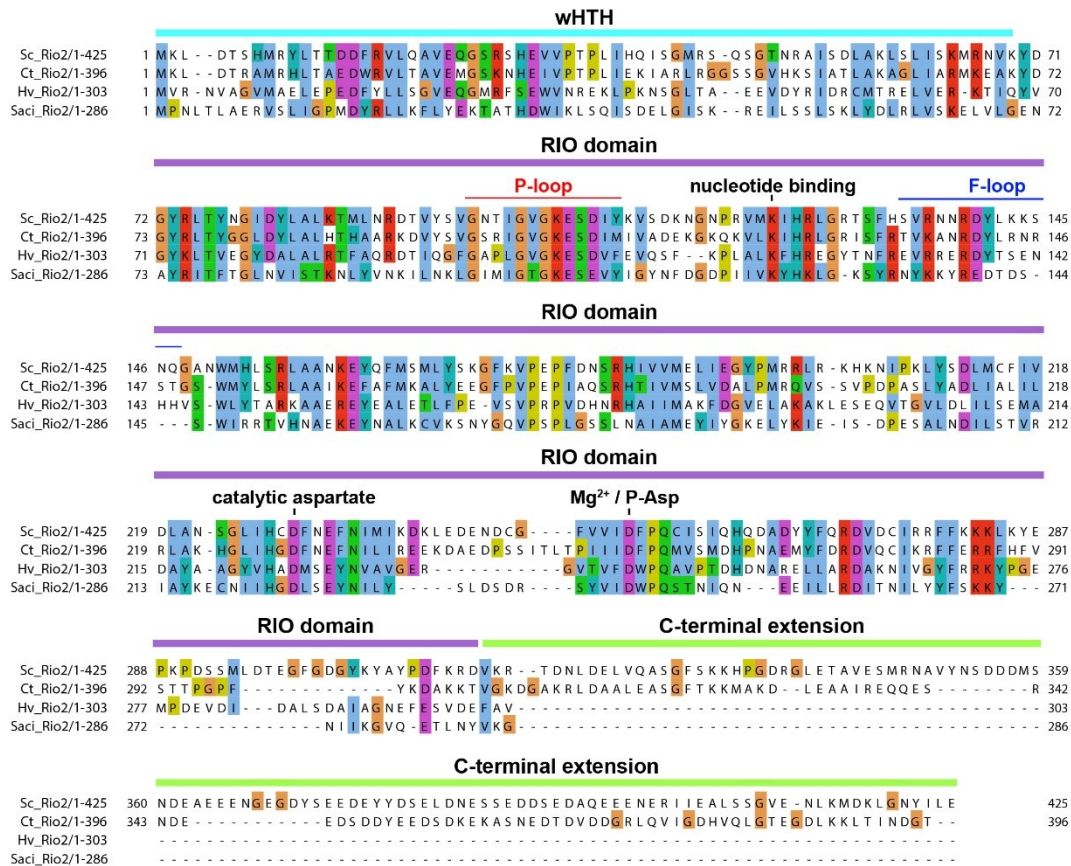

**B**

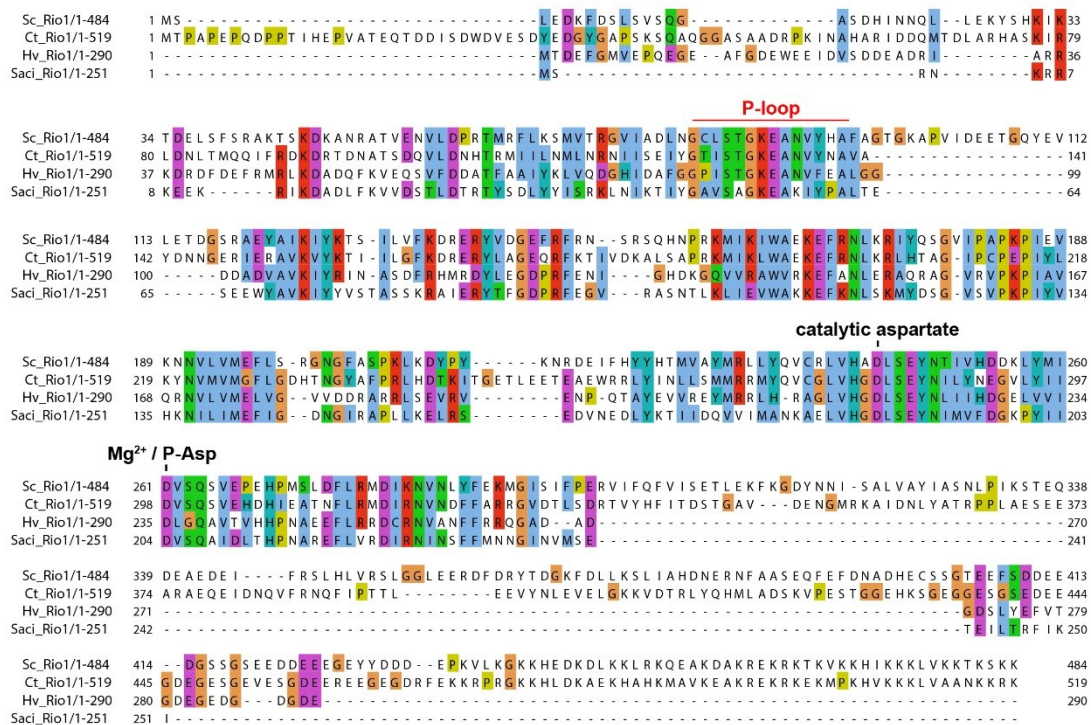

Supplementary Figure 1: Sequence alignments of representative Rio proteins

(A) Multiple sequence alignment of eukaryotic Rio2 orthologues in comparison to archaeal Rio2. Sequence alignment of eukaryotic *Sc\_Rio2* (*Saccharomyces cerevisiae*; P40160) and *Ct\_Rio2* (*Chaetomium thermophilum*; G0S5R3) in comparison to archaeal *Hv\_Rio2* (*Haloferax volcanii*; D4SG4) and *Saci\_Rio2* (*Sulfolobus acidocaldarius*; Q4JAL3) using Cobalt multiple sequence alignment server (<https://www.ncbi.nlm.nih.gov/tools/cobalt/cobalt.cgi?CMD=Web>) and Jalview. Indicated above the alignment are the different Rio2 structural domains including wHTH, RIO domain and C-terminal extension. Moreover, the catalytic residues, the flexible- and phosphate-loops (F-loop and P-loop, respectively) are indicated. (B) Multiple sequence alignment of eukaryotic Rio1 orthologues in comparison to archaeal Rio1. Sequence alignment of eukaryotic *Sc\_Rio1* (*Saccharomyces cerevisiae*; Q12196) and *Ct\_Rio1* (*Chaetomium thermophilum*; G0S3J5) in comparison to archaeal *Hv\_Rio1* (*Haloferax volcanii*; D4GYY1) and *Saci\_Rio1* (*Sulfolobus acidocaldarius*; Q4JA53) using Cobalt multiple sequence alignment server (<https://www.ncbi.nlm.nih.gov/tools/cobalt/cobalt.cgi?CMD=Web>) and Jalview. Indicated above the alignment are the different Rio2 structural domains including wHTH, RIO domain and C-terminal extension. Moreover, the catalytic residues, the flexible- and phosphate-loops (F-loop and P-loop, respectively) are indicated.

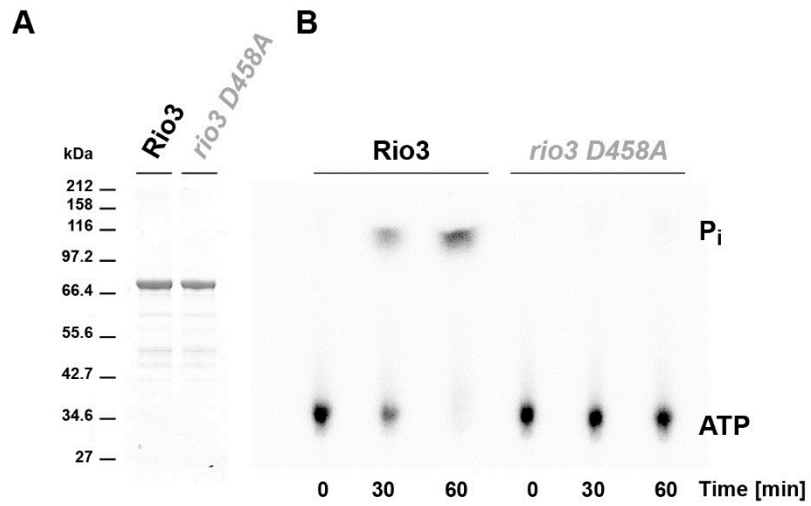

### Supplementary Figure 2: ATPase activity of *Drosophila melanogaster* *Dm\_Rio3*

ATPase activity of purified *Dm\_Rio3* (Q9VR42) and catalytic mutant *Dm\_rio3* D458A (DFG motif) (A) was analyzed by single-turnover experiment (B).

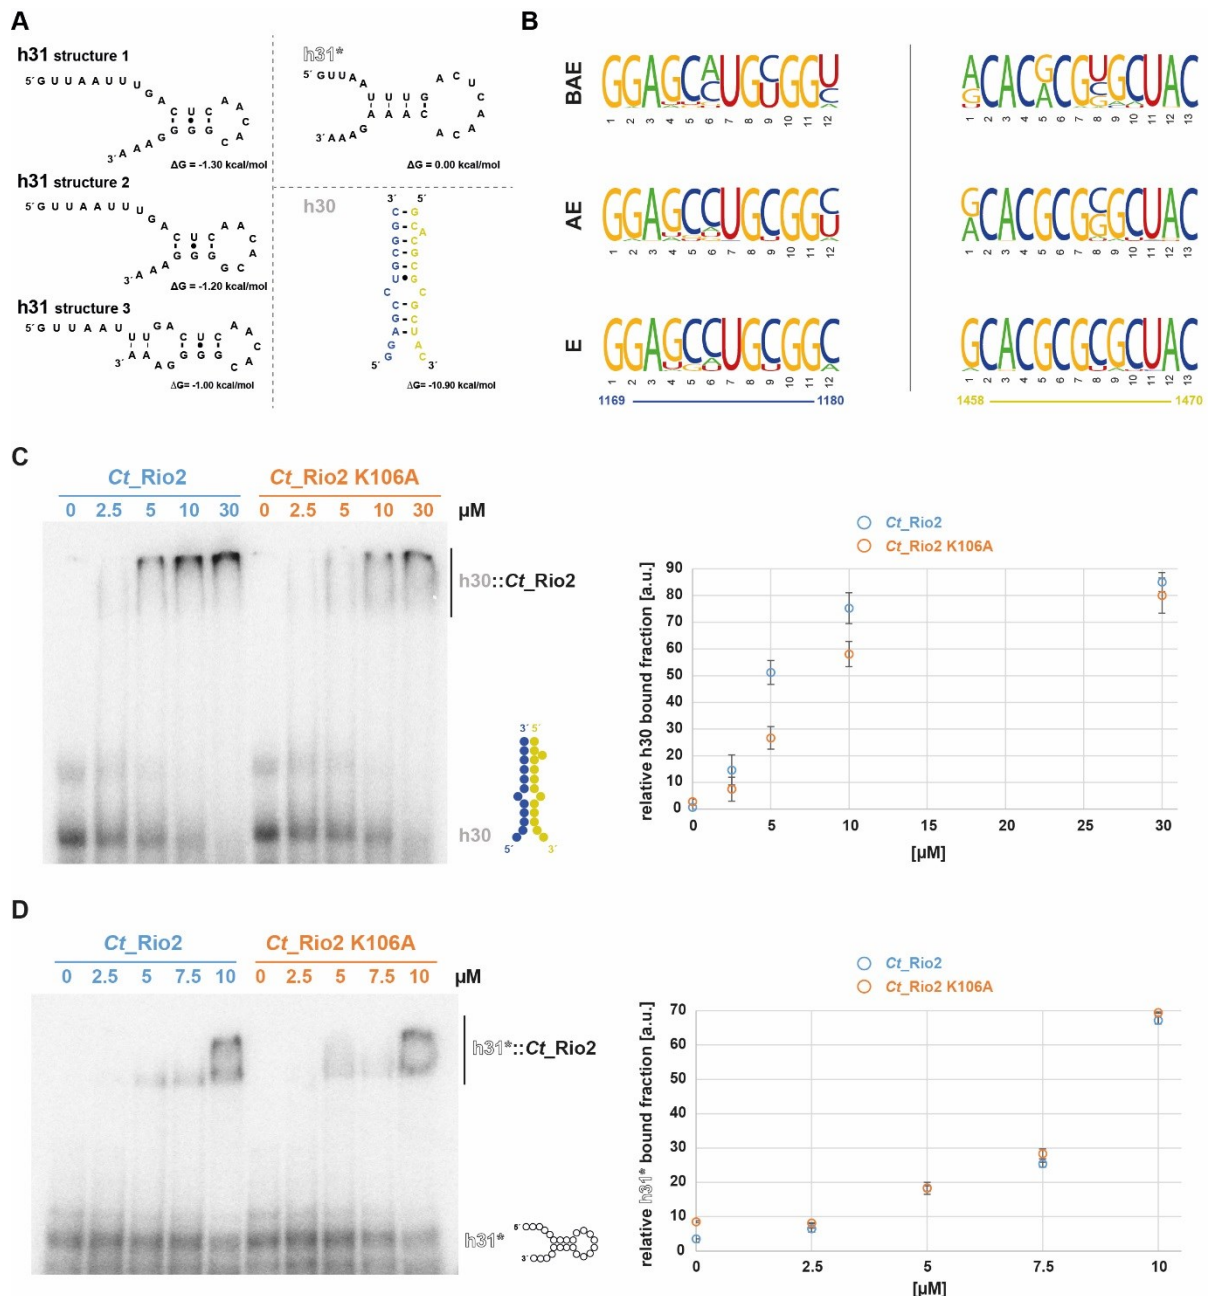

**Supplementary Figure 3: Interaction of Ct\_Rio2 with the conserved h30.**

(A) 2D structure prediction of RNA mimic used in this study. Single strand RNA 2D structure prediction where performed with mfold using default parameters (<http://unafold.rna.albany.edu/?q=mfold/>) (Zuker, 2003). Since, the h31 RNA mimic (18S rRNA 1181-1204 Sc numbering) was predicted to fold in an ensemble of RNAs (top hits – left panel) which were not folding into a “native” h31-like structure, we designed h31\* (upper right panel) allowing stabilization into an h31-like structure. For double RNA structure prediction (h30 lower right panel) the RNAcofold server was used (<http://rna.tbi.univie.ac.at/cgi-bin/RNAWebSuite/RNAcofold.cgi>) (Gruber et al., 2008). Region 18S rRNA 1169-80 and 1458-70 (Sc numbering) forming h30 are indicated in blue and yellow, respectively (B) Sequence conservation of h30. Representative SSU rRNA sequences (133 rRNA sequences) (Bernier et

al., 2014) from bacteria (B – 67 sequences), archaea (A – 36 sequences) and eukarya (E - 30 sequences) were aligned and visualized in Jalview (Waterhouse et al., 2009). The corresponding alignments obtained for region 1169-80 (Sc numbering) and 1458-70 of the 18S rRNA building h30 were used to generate sequence logo (Crooks et al., 2004) depicting position-dependent nucleotide frequency. (C-D) Interaction of *Ct\_Rio2* and *Ct\_Rio2* K106A with h31\* and h30 mimic RNA. Interaction of the indicated recombinant proteins with RNA mimic (depicted as cartoon) were analyzed by electro mobility shift assay (left panels). Quantitation and standard deviation were derived from 3 independent experiments (right panels). Note that the apparent weak affinity (in the  $\mu\text{M}$  range) of *Ct\_Rio2* and *Ct\_Rio2* K106A towards h31\* is similar, whereas the apparent binding affinity, also in the  $\mu\text{M}$  range, of h30 towards *Ct\_Rio2* K106A is slightly reduced in comparison to wild-type (Apparent  $K_d$  *Ct\_Rio2*=  $4.02 \pm 1.04 \mu\text{M}$  and *Ct\_Rio2* K106A=  $8.12 \pm 1.57 \mu\text{M}$ ).

## Supplementary Tables

**Table 1: Strains**

| <i>S. cerevisiae</i> strains | Name                                           | Description                                                                                                                         | Source                          |
|------------------------------|------------------------------------------------|-------------------------------------------------------------------------------------------------------------------------------------|---------------------------------|
|                              | <i>RIO2</i> shuffle strain                     | Mat <i>g</i> ; <i>his3</i> Δ; <i>leu2</i> Δ; <i>lys2</i> Δ; <i>met15</i> Δ; <i>ura3</i> Δ; YNL207w::kanMX4; pURA3- <i>RIO2</i> -GFP | (Ferreira-Cerca et al., 2012)   |
|                              | <i>RIO2</i> shuffle strain <i>Δltv1</i>        | <i>his3</i> Δ; <i>leu2</i> Δ; <i>ura3</i> Δ; YNL207w::kanMX4; YKL143W::kanMX4; pURA3- <i>RIO2</i> -GFP                              | (Ferreira-Cerca et al., 2012)   |
|                              | Tsr1-TAP                                       | Mat <i>a</i> ; <i>his3</i> Δ; <i>leu2</i> Δ; <i>lys2</i> Δ; <i>met15</i> Δ; <i>ura3</i> Δ; Tsr1-TAP::His3MX6                        | This study                      |
| <i>H. volcanii</i> strains   | Name                                           | Description                                                                                                                         | Source                          |
|                              | DS70                                           |                                                                                                                                     | (Allers et al., 2004)           |
|                              | H26                                            | <i>ΔpyrE2</i> (DS70)                                                                                                                | (Allers et al., 2004)           |
|                              | H53                                            | <i>ΔtrpA ΔpyrE2</i> (DS70)                                                                                                          | (Allers et al., 2004)           |
|                              | H98                                            | <i>ΔhdrB ΔpyrE2</i> (DS70)                                                                                                          | (Allers et al., 2004)           |
|                              | H99                                            | <i>ΔtrpA ΔhdrB ΔpyrE2</i> (DS70)                                                                                                    | (Allers et al., 2004)           |
|                              | SFC - <i>rio1::trpA</i>                        | <i>rio1::trpA ΔtrpA ΔpyrE2</i> (H53)                                                                                                | This study - Ferreira-Cerca Lab |
|                              | SFC - <i>rio2::trpA</i>                        | <i>rio2::trpA ΔtrpA ΔpyrE2</i> (H53)                                                                                                | This study - Ferreira-Cerca Lab |
|                              | SMH666/ SMH677 - <i>rio1::trpA</i>             | <i>rio1::trpA ΔtrpA ΔhdrB ΔpyrE2</i> (H99)                                                                                          | This study - MacNeill Lab       |
|                              | SMH668/ SMH669 - <i>rio2::trpA</i>             | <i>rio2::trpA ΔtrpA ΔhdrB ΔpyrE2</i> (H99)                                                                                          | This study - MacNeill Lab       |
|                              | SMH670/ SMH671 - <i>rio1::hdrB</i>             | <i>rio1::hdrB ΔtrpA ΔhdrB ΔpyrE2</i> (H99)                                                                                          | This study - MacNeill Lab       |
|                              | SMH672/ SMH673 - <i>rio2::hdrB</i>             | <i>rio2::hdrB ΔtrpA ΔhdrB ΔpyrE2</i> (H99)                                                                                          | This study - MacNeill Lab       |
|                              | SMH674/ SMH 675 - <i>rio1::trpA rio2::hdrB</i> | <i>rio1::trpA rio2::hdrB ΔtrpA ΔhdrB ΔpyrE2</i> (H99)                                                                               | This study - MacNeill Lab       |
|                              | SMH676/ SMH 677 - <i>rio1::hdrB rio2::trpA</i> | <i>rio1::hdrB rio2::trpA ΔtrpA ΔhdrB ΔpyrE2</i> (H99)                                                                               | This study - MacNeill Lab       |

**Table 2: Plasmids**

| Yeast vectors                        |                                                                                  |                               |
|--------------------------------------|----------------------------------------------------------------------------------|-------------------------------|
| Name                                 | Description                                                                      | Source                        |
| pRS315- <i>RIO2</i>                  | CEN; LEU2; <i>RIO2</i> ORF including 500nt before ATG and 140nt after stop codon | (Ferreira-Cerca et al., 2012) |
| pRS315- <i>rio2</i> D253A            | CEN; LEU2; <i>RIO2</i> ORF including 500nt before ATG and 140nt after stop codon | (Ferreira-Cerca et al., 2012) |
| pRS315- <i>rio2</i> K105E            | CEN; LEU2; <i>RIO2</i> ORF including 500nt before ATG and 140nt after stop codon | (Ferreira-Cerca et al., 2012) |
| pRS315- <i>rio2</i> K105A            | CEN; LEU2; <i>RIO2</i> ORF including 500nt before ATG and 140nt after stop codon | This study                    |
| pRS315- <i>rio2</i> G99A             | CEN; LEU2; <i>RIO2</i> ORF including 500nt before ATG and 140nt after stop codon | This study                    |
| pRS315- <i>rio2</i> G102A            | CEN; LEU2; <i>RIO2</i> ORF including 500nt before ATG and 140nt after stop codon | This study                    |
| pRS315- <i>rio2</i> G104A            | CEN; LEU2; <i>RIO2</i> ORF including 500nt before ATG and 140nt after stop codon | This study                    |
| pRS315- <i>rio2</i> G106E            | CEN; LEU2; <i>RIO2</i> ORF including 500nt before ATG and 140nt after stop codon | This study                    |
| pRS315- <i>rio2</i> G106S            | CEN; LEU2; <i>RIO2</i> ORF including 500nt before ATG and 140nt after stop codon | This study                    |
| pRS315- <i>rio2</i> G107A            | CEN; LEU2; <i>RIO2</i> ORF including 500nt before ATG and 140nt after stop codon | This study                    |
| YEP352-GAL:: <i>RIO2</i>             | 2 $\mu$ ; URA3; <i>RIO2</i> ORF under <i>GAL</i> promoter                        | (Ferreira-Cerca et al., 2012) |
| YEP352-GAL:: <i>rio2</i> D253A       | 2 $\mu$ ; URA3; <i>RIO2</i> ORF under <i>GAL</i> promoter                        | (Ferreira-Cerca et al., 2012) |
| YEP352-GAL:: <i>rio2</i> K105A       | 2 $\mu$ ; URA3; <i>RIO2</i> ORF under <i>GAL</i> promoter                        | This study                    |
| YEP352-GAL:: <i>rio2</i> K105A D253A | 2 $\mu$ ; URA3; <i>RIO2</i> ORF under <i>GAL</i> promoter                        | This study                    |
| Ycplac111-Rio2-TAP                   | CEN; LEU2; <i>RIO2</i> ORF fused to TAP-tag including 500nt before ATG           | (Ferreira-Cerca et al., 2012) |
| Ycplac111- <i>rio2</i> D253A-TAP     | CEN; LEU2; <i>RIO2</i> ORF fused to TAP-tag including 500nt before ATG           | (Ferreira-Cerca et al., 2012) |
| Ycplac111- <i>rio2</i> K105A-TAP     | CEN; LEU2; <i>RIO2</i> ORF fused to TAP-tag including 500nt before ATG           | This study                    |
| <i>E. coli</i> expression vectors    |                                                                                  |                               |
| Name                                 | Description                                                                      | Source                        |
| pT7::His6-TEV- <i>ct RIO2</i>        | <i>E. coli</i> expression vector; Amp                                            | (Ferreira-Cerca et al., 2012) |
| pT7::His6-TEV- <i>ct rio2</i> D257A  | <i>E. coli</i> expression vector; Amp                                            | (Ferreira-Cerca et al., 2012) |
| pT7::His6-TEV- <i>ct rio2</i> K106E  | <i>E. coli</i> expression vector; Amp                                            | (Ferreira-Cerca et al., 2012) |
| pT7::His6-TEV- <i>ct rio2</i> K106A  | <i>E. coli</i> expression vector; Amp                                            | This study                    |
| pET24a-Hv_Rio1                       | <i>E. coli</i> expression vector; Kan                                            | This study                    |
| pET24a-Hv_Rio1 D235A                 | <i>E. coli</i> expression vector; Kan                                            | This study                    |
| pET24a-Hv_Rio2                       | <i>E. coli</i> expression vector; Kan                                            | This study                    |
| pET24a-Hv_Rio2 D242A                 | <i>E. coli</i> expression vector; Kan                                            | This study                    |
| pET15b-Saci_Rio1                     | <i>E. coli</i> expression vector; Amp                                            | This study                    |
| pET15b-Saci_Rio1 D204A               | <i>E. coli</i> expression vector; Amp                                            | This study                    |



| <i>E. coli</i> expression vectors<br>(continued) |                                       |            |
|--------------------------------------------------|---------------------------------------|------------|
| Name                                             | Description                           | Source     |
| pET15b-Saci_Rio2                                 | <i>E. coli</i> expression vector; Amp | This study |
| pET15b-Saci_Rio2 D243A                           | <i>E. coli</i> expression vector; Amp | This study |
| pET24a-Dm_Rio3                                   | <i>E. coli</i> expression vector; Kan | This study |
| pET24a-Dm_rio3 D458A                             | <i>E. coli</i> expression vector; Kan | This study |

| <i>H. volcanii</i> vectors   |                   |                                 |
|------------------------------|-------------------|---------------------------------|
| Name                         | Description       | Source                          |
| pTA131                       | Amp; <i>pyrE2</i> | (Allers et al., 2004)           |
| pTA131-Rio1usds              | pTA131 derivative | This study - Ferreira-Cerca Lab |
| pTA131-Rio2usds              | pTA131 derivative | This study - Ferreira-Cerca Lab |
| pTA131- <i>rio1::trpA</i>    | pTA131 derivative | This study - Ferreira-Cerca Lab |
| pTA131- <i>rio2::trpA</i>    | pTA131 derivative | This study - Ferreira-Cerca Lab |
| pTA131-HfxRio1-EBSX          | pTA131 derivative | This study - MacNeill Lab       |
| pTA131-HfxRio2-EBSX          | pTA131 derivative | This study - MacNeill Lab       |
| pTA131-HfxRio1Δ- <i>trpA</i> | pTA131 derivative | This study - MacNeill Lab       |
| pTA131-HfxRio1Δ- <i>hdrB</i> | pTA131 derivative | This study - MacNeill Lab       |
| pTA131-HfxRio2Δ- <i>trpA</i> | pTA131 derivative | This study - MacNeill Lab       |
| pTA131-HfxRio2Δ- <i>hdrB</i> | pTA131 derivative | This study - MacNeill Lab       |

**Table 3: Oligonucleotides**

| <b>Primers for yeast Rio2 mutants</b>                                          |                                                                           |
|--------------------------------------------------------------------------------|---------------------------------------------------------------------------|
| scRio2 G98A Fw                                                                 | 5´-GAGACACTGTCTATTCTGTGcgcAACACTATTggtGTTgg-3´                            |
| scRio2 G98A Rv                                                                 | 5´-ccAACaccAATAGTGTtggcGACAGAATAGACAGTGTCTC-3´                            |
| scRio2 G102A Fw                                                                | 5´-CTGTCggtAACACTATTgccGTTggtAAGGAATCTGACATC-3´                           |
| scRio2 G102A Rv                                                                | 5´-GATGTCAGATTCTTaccAACggcAATAGTGTtaccGACAG-3´                            |
| scRio2 G104A Fw                                                                | 5´-GTCggtAACACTATTgccGTTggtAAGGAATCTGACATCTATAAAG-3´                      |
| scRio2 G104A Rv                                                                | 5´-CTTTATAGATGTCAGATTCTTaccAACggcAATAGTGTtaccGAC-3´                       |
| scRio2 K105A Fw                                                                | 5´-GGTAACACTATTGGTGTGGTgcccGAATCTGACATCTATAAAGT-3´                        |
| scRio2 K105A Rv                                                                | 5´-ACTTTATAGATGTCAGATTcggcACCAACACCAATAGTGTtACC-3´                        |
| scRio2 E106A Fw                                                                | 5´-GTAACACTATTGGTGTGGTAAGgcccTCTGACATCTATAAAGTAAG-3´                      |
| scRio2 E106A Rv                                                                | 5´-CTTACTTTATAGATGTCAGAggcCTTACCAACACCAATAGTGTtAC-3´                      |
| scRio2 E106S Fw                                                                | 5´-GTAACACTATTGGTGTGGTAAGtctTCTGACATCTATAAAGTAAG-3´                       |
| scRio2 E106S Rv                                                                | 5´-CTTACTTTATAGATGTCAGAagaCTTACCAACACCAATAGTGTtAC-3´                      |
| scRio2 S107A Fw                                                                | 5´-CACTATTGGTGTGGTAAGGAAgccGACATCTATAAAGTAAGTAC-3´                        |
| scRio2 S107A Rv                                                                | 5´-GTCACTACTTTATAGATGTCggcTTCCTTACCAACACCAATAGTG-3´                       |
| <b>Primers for cloning of recombinant Rio proteins</b>                         |                                                                           |
| oHv011-HvRio2-Nde-Fw                                                           | 5´-gaggcgccatATGGTACGGAACGTCGCCGGC-3´                                     |
| oHv012-HvRio2-His6-Bam-Rv                                                      | 5´-<br>tattatggatccTCAGtgggtggtggtggtggtggccGACGGCGAACTCGTCGACGCTC-<br>3´ |
| oHv122-HvRio2 D242A Fw                                                         | 5´-GCGCGGCGTCACGGTGTTCGcCTGGCCGACGGCCGTCCCG-3´                            |
| oHv123-HvRio2 D242A Rv                                                         | 5´-CGGGACGGCCTGCGGCCAGgCGAACACCGTGACGCCGGC-3´                             |
| Saci_0796_Rio2 Fw NdeI                                                         | 5´-AAACATATGATGCCTAATCTCACTTTAGCGC-3´                                     |
| Saci_0796_Rio2 Rv BamHI                                                        | 5´-AAAGGATCCCTACCCCTTAACATAGTTTAAGGTTTC-3´                                |
| Saci_001_Rio2 Nde Fw                                                           | 5´-ggcagcCATATGCCTAATCTCACTTTAGCG-3´                                      |
| Saci_002_Rio2 XhoI Rv                                                          | 5´-cggatcCTCGAGCTACCCCTTAACATAGTTTAAG-3´                                  |
| Saci_003_Rio2 D243A Fw                                                         | 5´-CGATAGATCTTACGTTATCGcTTGGCCCTCAAAGTACAAATATAC-3´                       |
| Saci_004_Rio2 D243A Rv                                                         | 5´-GTATATTTGTACTTTGAGGCCAAgCGATAACGTAAGATCTATCG-3´                        |
| Saci_0965_Rio1 Fw NdeI                                                         | 5´-AAACATATGTTGTACGAAACAAAAGGAGAAA-3´                                     |
| Saci_0965_Rio1 Rv BamHI                                                        | 5´-AAAGGATCCCTAAATTTTAATAAAACGAGTTAATATTTCCGTC-3´                         |
| Saci_005_Rio1 Nde Fw                                                           | 5´-ggcagcCATATGtTgtcagaaacaaaaggag-3´                                     |
| Saci_006_Rio1 Bam Rv                                                           | 5´-gcagccGGATCCttaaattttaataaaacgag-3´                                    |
| Saci_007_Rio1 D204A Fw                                                         | 5´-GATGGTAAACCGTATATAATAGcTGTTAGCCAAGCCATAGATC-3´                         |
| Saci_008_Rio1 D204A Rv                                                         | 5´-GATCTATGGCTTGGCTAACAgCTATTATATACGGTTTACCATC-3´                         |
| CtRio2 K106A                                                                   | 5´-GGTAGCCGATCGGCGTTGGAgctGAGAGTGATATCATGATTGTG-3´                        |
| CtRio2 K106A                                                                   | 5´-CACAATCATGATATCACTCTCagcTCCAACGCCGATGCGGCTACC-3´                       |
| dmRioK3 Nde Fw                                                                 | 5´-gcgctacatATGTCGTCGCCATGGGTTAAG-3´                                      |
| dmRioK3 XhoI Rv                                                                | 5´-cacgtgctcgagATGGTTGGCAGTTTTGTAAATC-3´                                  |
| <b>Primers for <i>H. volcanii</i> deletion constructs (Ferreira-Cerca Lab)</b> |                                                                           |
| oHv025-KOus-HvRio2-KpnI-Fw                                                     | 5´-GCATCGAGGGT <u>ACCTCGTCGTGCGAATCGCGGACG</u> -3´                        |
| oHv026-KOus-HvRio2-Bam-Rv                                                      | 5´-AGCGGAGGGGTCTCGACGGCG <u>GATCCGCACGTCCGTCCGTCCGGCGA</u> -3´            |
| oHv027-KOds-HvRio2-Bam-Fw                                                      | 5´-TCGCCGACGGACGGACGTGCGGATCCGCCGTGAGACCCCTCCGCT-3´                       |
| oHv028-KOds-HvRio2-XbaI-Rv                                                     | 5´-CTAGCCACTCTAGAGACCTCGCGCTCGACGGCGTGGC-3´                               |
| oHv029-KOus-HvRio1-KpnI-Fw                                                     | 5´-GCATCGAGGGT <u>ACCCCGCGGTGCGAAAACGGGTGT</u> -3´                        |
| oHv030-KOus-HvRio1-Bam-Rv                                                      | 5´-TCTCGCGCGGGTCTGGGTTGGGATCC <u>TGGACTAGGGCTACGAGAGG</u> -3´             |
| oHv031-KOds-HvRio1-Bam-Fw                                                      | 5´-CCTCTCGTAGCCCTAGTCCAGGATCCCAACCCAGACCCCGCGGAGA-3´                      |
| oHv032-KOds-HvRio1-XbaI-Rv                                                     | 5´-CTAGCCACTCTAGAGGTTTATCTGTGGCTTTCGCC-3´                                 |

Note: Corresponding restriction sites are underlined.

**Primers for *H. volcanii* deletion constructs (MacNeill Lab)**

|             |                                            |
|-------------|--------------------------------------------|
| HfxRio1-U5E | 5' -GTGGTGGTGTGAATTCATACCACGACGGCGTTT-3'   |
| HfxRio1-U3B | 5' -GTGGTGGTGTGGATCCTGGACTAGGGCTACGAGAG-3' |
| HfxRio1-D5B | 5' -GTGGTGGTGTGGATCCCAACCCAGACCCGCCGCGA-3' |
| HfxRio1-D3S | 5' -GTGGTGGTGTACTAGTTGGCCGATGATGCCGAGC-3'  |
| HfxRio2-U5E | 5' -GTGGTGGTGTGAATTCGTGGGTTGATTCACGCCCG-3' |
| HfxRio2-U3B | 5' -GTGGTGGTGTGAATTCGTGGGTTGATTCACGCCCG-3' |
| HfxRio2-D5B | 5' -GTGGTGGTGTGGATCCGCCGTCGAGACCCCTCCGC-3' |
| HfxRio2-D3S | 5' -GTGGTGGTGTACTAGTTGTACCACAACCTCCGCC-3'  |

Note: Indicated restriction sites are underlined (E for EcoRI, B for BamHI, S for SpeI).

**Primers used for diagnostic PCR (shown in Figure 1A)**

|                 |                                                    |
|-----------------|----------------------------------------------------|
| HfxRio1-P1      | 5' -AGAGGGCAGCATACCGATAC-3'                        |
| HfxRio1-P2      | 5' -GGGCACCGTCGAGAATCATC-3'                        |
| HfxRio2-P1      | 5' -CGACGGCGAGGGCGCGGTCG-3'                        |
| HfxRio2-P2      | 5' -AACTACTGGCCGATGGCCGC-3'                        |
| HfxTrpA-F       | 5' -TCGGCGTGGTCGCCGTCGCT-3'                        |
| HfxTrpA-R       | 5' -CTTCCGTTCTCGGAGCCCAT-3'                        |
| HfxHdrB-F       | 5' -CGTGGCACCTCCCCGAGGAC-3'                        |
| HfxHdrB-R       | 5' -GTCGCCTTCGTGTGCCGCGT-3'                        |
| HfxMCM-NTD-5Bsa | 5' -TGTGTGGTCTCTGCGCCGCGCAGGCCCCCAAGAACCGTGACCT-3' |
| HfxMCM-NTD-3Bsa | 5' -GTTGTTGTGTGGTCTCGTATCAGACCATCTTCTCGTAGAT-3'    |

**Primers used for Northern blot analysis (shown in Figure 2A)**

|                   |                              |
|-------------------|------------------------------|
| oHv189-Hv-16S-003 | 5' -CTCCTCCGTTGTAGTGCTC-3'   |
| oHv190-Hv-S2-004  | 5' -cgtcggggtggtctcggtcg-3'  |
| oHv194-Hv-23S-008 | 5' -CCTCGGCTGATTGACAGTGCC-3' |

**Primers used for *in vitro* transcription**

|                   |                                                     |
|-------------------|-----------------------------------------------------|
| T7+h31 Fw         | 5' -TAATACGACTCACTATAGGGTAAATTTGACTCAACACGGGGAAA-3' |
| T7+h31 Rv         | 5' -TTTCCCCGTGTTGAGTCAAATTAACCCATAGTGAGTCGTATTA-3'  |
| T7+h31-Stab Fw    | 5' -TAATACGACTCACTATAGGGTAAATTTGACTCAACACAAAGAAA-3' |
| T7+h31-Stab Rv    | 5' -TTTCTTTGTGTTGAGTCAAATTAACCCATAGTGAGTCGTATTA-3'  |
| T7-18S-1169-80 Fw | 5' -TAATACGACTCACTATAGGGgagcctgcggc-3'              |
| T7-18S-1169-80 Rv | 5' -gccgcaggctcCCCTATAGTGAGTCGTATTA-3'              |
| T7-18S-1458-70 Fw | 5' -TAATACGACTCACTATAGGGcaccgcgcgtac-3'             |
| T7-18S-1458-70 Rv | 5' -gtagcgcgcgtgCCCTATAGTGAGTCGTATTA-3'             |

Note: Synthesized RNA is indicated in bold

**Synthetic RNA**

|                    |                                 |
|--------------------|---------------------------------|
| 18S rRNA 1169-1180 | 5' -ggagccugcggc-3'             |
| 18S rRNA 1458-1470 | 5' -gcacgcgcguac-3'             |
| 18S rRNA h31-Stab  | 5' -uuaauuugacucaacacaaagaaa-3' |

Note: All RNA were synthesized at Biomers and HPLC purified

## Supplementary References

Allers, T., Ngo, H.-P., Mevarech, M., and Lloyd, R.G. (2004). Development of Additional Selectable Markers for the Halophilic Archaeon *Haloferax volcanii* Based on the *leuB* and *trpA* Genes. *Appl. Environ. Microbiol.* *70*, 943–953.

Bernier, C.R., Petrov, A.S., Waterbury, C.C., Jett, J., Li, F., Freil, L.E., Xiong, X., Wang, L., Migliozi, B.L.R., Herskovits, E., et al. (2014). RiboVision suite for visualization and analysis of ribosomes. *Faraday Discuss.* *169*, 195–207.

Crooks, G.E., Hon, G., Chandonia, J.-M., and Brenner, S.E. (2004). WebLogo: A Sequence Logo Generator. *Genome Res.* *14*, 1188–1190.

Ferreira-Cerca, S., Sagar, V., Schäfer, T., Diop, M., Wesseling, A.-M., Lu, H., Chai, E., Hurt, E., and LaRonde-LeBlanc, N. (2012). ATPase-dependent role of the atypical kinase Rio2 on the evolving pre-40S subunit. *Nat. Struct. Mol. Biol.* *19*, 1316–1323.

Gruber, A.R., Lorenz, R., Bernhart, S.H., Neuböck, R., and Hofacker, I.L. (2008). The Vienna RNA Websuite. *Nucleic Acids Res.* *36*, W70–W74.

Waterhouse, A.M., Procter, J.B., Martin, D.M.A., Clamp, M., and Barton, G.J. (2009). Jalview Version 2—a multiple sequence alignment editor and analysis workbench. *Bioinformatics* *25*, 1189–1191.

Zuker, M. (2003). Mfold web server for nucleic acid folding and hybridization prediction. *Nucleic Acids Res.* *31*, 3406–3415.
